# Supplementary material
Source: publisher figshare collection journal article supplement (https://sage.figshare.com/ndownloader/files/20907405)
Supplement: Supplementary file 1 [file 20907405]

## APPENDIX. Elaborated observations of the pitfalls in the interview data

| Pitfall                                                          | Related observations in interview data                                                                                                                                                                                                                                                                                                                                                                                                                                                                                                                                                                                                                                                                                                                                                                                                                                                                                                                                                                                                                                                                                                                                                                                                                                                                                                                                                                                                                                                                                                                                                                                                                                                                                                                                                                      |
|------------------------------------------------------------------|-------------------------------------------------------------------------------------------------------------------------------------------------------------------------------------------------------------------------------------------------------------------------------------------------------------------------------------------------------------------------------------------------------------------------------------------------------------------------------------------------------------------------------------------------------------------------------------------------------------------------------------------------------------------------------------------------------------------------------------------------------------------------------------------------------------------------------------------------------------------------------------------------------------------------------------------------------------------------------------------------------------------------------------------------------------------------------------------------------------------------------------------------------------------------------------------------------------------------------------------------------------------------------------------------------------------------------------------------------------------------------------------------------------------------------------------------------------------------------------------------------------------------------------------------------------------------------------------------------------------------------------------------------------------------------------------------------------------------------------------------------------------------------------------------------------|
| Boxing in design with ineffective cross-functional collaboration | <p>Acknowledging the need for collaboration across the organization to address complex issues and how siloes deter this</p> <ul style="list-style-type: none"> <li>• in-built complexity that needs to be addressed in design efforts</li> <li>• need for cross-functional collaboration</li> <li>• frequency of targeting mid-managers with issue selling attempts, acknowledging importance of buy-in from different mid-managers</li> </ul> <p>Experiences of insufficient space given for design efforts to be effective in terms of scope, mandate, timing and resources</p> <ul style="list-style-type: none"> <li>• negative experiences of design being involved too late or not at all, given too little time, too rigid/narrow scope provided for work, limited resources</li> </ul> <p>Struggling to get engineers across the organization on board with design efforts, spending considerable time and effort to “sell” designerly approaches to them</p> <ul style="list-style-type: none"> <li>• efforts spent to convert engineers into user-centered ways of working, variety of issue selling tactics employed</li> <li>• frustration over engineers’ understanding and appreciation of design, tensions between the ways of working of designers and engineers</li> <li>• struggling to get designs accepted, noting importance of using words, concepts and proof that appeal to engineers, importance of showcasing success</li> </ul> <p>Highlighting the leverage of mid-level managers in creating space for design or thwarting efforts when crossing siloes</p> <ul style="list-style-type: none"> <li>• time spent on issue selling efforts</li> <li>• lack of own budget and thus authority</li> <li>• different views on design and its role, conflicting priorities</li> </ul> |
| Detached information resulting in unactionable design thinking   | <p>Reporting disappointment in design thinking training</p> <ul style="list-style-type: none"> <li>• frequent references to training organized in the companies, reflections on shortcomings of training and challenges in organizing effective training</li> <li>• misconceptions created or manifested in or despite of training</li> <li>• unrealistic expectations for those attending in a short design thinking training</li> <li>• neglecting deep design expertise when too focused on spreading design thinking</li> </ul> <p>Citing too theoretical approach and inability to move from words to actions</p> <ul style="list-style-type: none"> <li>• lack of or limited hands-on design practice</li> <li>• sticking with old ways of operating</li> <li>• limited contacts with clients, no client input or feedback</li> <li>• lack of user research and testing</li> </ul> <p>Citing a lack of budget for doing user research, experimentation, testing and utilizing design resources</p> <ul style="list-style-type: none"> <li>• lack of time and money for user research and user testing</li> <li>• lack of funds for projects to work in design resources into their budget, inability to hire or contract external designers</li> </ul>                                                                                                                                                                                                                                                                                                                                                                                                                                                                                                                                                |
| Fragmented design efforts                                        | <p>Noting a lack of unity amongst designers and design output</p> <ul style="list-style-type: none"> <li>• lack of opportunities to interact with other designers, being caught unaware of some design colleague in the organization</li> <li>• factions related to terminology and priorities amongst designers</li> </ul>                                                                                                                                                                                                                                                                                                                                                                                                                                                                                                                                                                                                                                                                                                                                                                                                                                                                                                                                                                                                                                                                                                                                                                                                                                                                                                                                                                                                                                                                                 |

|                                   |                                                                                                                                                                                                                                                                                                                                                                                                                                                                                                                                                                                                                                                                                                                                                                                                                                                                                                                                                                                                                                                                                                                                                                                                                                                                                                                                      |
|-----------------------------------|--------------------------------------------------------------------------------------------------------------------------------------------------------------------------------------------------------------------------------------------------------------------------------------------------------------------------------------------------------------------------------------------------------------------------------------------------------------------------------------------------------------------------------------------------------------------------------------------------------------------------------------------------------------------------------------------------------------------------------------------------------------------------------------------------------------------------------------------------------------------------------------------------------------------------------------------------------------------------------------------------------------------------------------------------------------------------------------------------------------------------------------------------------------------------------------------------------------------------------------------------------------------------------------------------------------------------------------|
| <p>lacking a shared framework</p> | <ul style="list-style-type: none"> <li>• need to and appreciation of continuously learning from other designers, recounting positive experiences of working side-by-side</li> <li>• need for unified design guidelines or tools across the organization</li> <li>• attempts to unite designers or showing up in numbers to increase the weight of the design message</li> </ul> <p>Perceiving a lack of leadership, structural, and cultural support for design</p> <ul style="list-style-type: none"> <li>• need for clear vision and focus</li> <li>• lack of legitimacy and decision-making mandate</li> <li>• lack of senior positions for designers, being invited to only facilitate (not take part in) strategy making</li> <li>• lack of leadership support from both top management and middle management</li> </ul> <p>Describing design efforts being counteracted by incompatible organizational culture and processes</p> <ul style="list-style-type: none"> <li>• being at odds with the traditional organizational culture of bureaucracy and/or technology focus without the needed freedom for creativity, customer focus, risk-taking, and tolerance of failures</li> <li>• frustration with lacking or unsupportive processes and challenges in efforts to improve them</li> <li>• lack of flexibility</li> </ul> |
|-----------------------------------|--------------------------------------------------------------------------------------------------------------------------------------------------------------------------------------------------------------------------------------------------------------------------------------------------------------------------------------------------------------------------------------------------------------------------------------------------------------------------------------------------------------------------------------------------------------------------------------------------------------------------------------------------------------------------------------------------------------------------------------------------------------------------------------------------------------------------------------------------------------------------------------------------------------------------------------------------------------------------------------------------------------------------------------------------------------------------------------------------------------------------------------------------------------------------------------------------------------------------------------------------------------------------------------------------------------------------------------|
